# Supplementary material for: Relative Hand Grip and Back Muscle Strength, but Not Mean Muscle Strength, as Risk Factors for Incident Metabolic Syndrome and Its Metabolic Components: 16 Years of Follow-Up in a Population-Based Cohort Study
Source: MDPI journal article supplement (doi:10.3390/app11115198), 2021-06-03
Supplement: s1 [file s1]

# Supplementary materials: Relative Hand Grip and Back Muscle Strength, but Not Mean Muscle Strength, as Risk Factors for Incident Metabolic Syndrome and Its Metabolic Components: 16 Years of Follow-Up in a Population-Based Cohort Study

Yoo-Jeong Jeon <sup>1,†</sup>, Seung Ku Lee <sup>2,†</sup> and Chol Shin <sup>2,3,4,\*</sup>

<sup>1</sup> Department of Sports & Health Science, Hanbat National University, Daejeon 34158, Korea; jyjong20@hanbat.ac.kr

<sup>2</sup> Institute of Human Genomic Study, College of Medicine, Korea University, Seoul 02841, Korea; leeseungku@korea.ac.kr

<sup>3</sup> Division of Pulmonary Sleep and Critical Care Medicine, Department of Internal Medicine, Korea University Ansan Hospital, Ansan 15355, Korea

<sup>4</sup> Transdisciplinary Major in Learning Health Systems, Department of Healthcare Sciences, Graduate School, Korea University, Seoul 02841, Korea

\* Correspondence: chol-shin@korea.ac.kr; Tel.: +82-31-412-5603

† These authors contributed equally to this work.

**Table S1.** Baseline characteristics according to sex.

|                                      |                | Women (n=1215) | Men (n=1323) |         |
|--------------------------------------|----------------|----------------|--------------|---------|
| General characteristics              |                |                |              |         |
| Age                                  |                | 47.9±7.0       | 47.8±6.8     | 0.727   |
| Smoker                               | Ex-smoker      | 12 (1.0%)      | 469 (35.4%)  | < 0.001 |
|                                      | Current smoker | 23 (1.9%)      | 566 (42.8%)  |         |
| Family history of T2DM               | Yes            | 192 (15.8%)    | 176 (13.3%)  | 0.074   |
|                                      | No             | 1023 (84.2%)   | 1147 (86.7%) |         |
| Family history of hypertension       | Yes            | 254 (20.9%)    | 264 (20.0%)  | 0.553   |
|                                      | No             | 961 (79.1%)    | 1059 (80.0%) |         |
| Job                                  | Blue color     | 365 (30.0%)    | 922 (69.7%)  | < 0.001 |
|                                      | White color    | 50 (4.1%)      | 313 (23.7%)  |         |
|                                      | House keeper   | 800 (65.8%)    | 88 (6.7%)    |         |
| Income (KRW)                         | < 1 million    | 184 (15.1%)    | 97 (7.3%)    | < 0.001 |
|                                      | 1–2            | 371 (30.5%)    | 367 (27.7%)  |         |
|                                      | 2–4            | 525 (43.2%)    | 643 (48.6%)  |         |
|                                      | 4 ≤            | 135 (11.1%)    | 216 (16.3%)  |         |
| Education                            | ≤ 12 Years     | 1078 (88.7%)   | 900 (68.0%)  | < 0.001 |
|                                      | 12< Years      | 137 (11.3%)    | 423 (32.0%)  |         |
| Marry Status                         | Yes            | 1097 (90.3%)   | 1286 (97.2%) | < 0.001 |
| Menopause Status                     | Yes            | 236 (19.4%)    |              |         |
| Body Mass Index (kg/m <sup>2</sup> ) |                | 24.4±2.8       | 24.5±2.7     | 0.355   |
| Height (Cm)                          |                | 155.3±5.0      | 167.8±5.6    | < 0.001 |
| Weight (Kg)                          |                | 58.8±7.2       | 69.1±8.9     | < 0.001 |
| Alcohol consumption (g/day)          |                | 1.5±5.4        | 19.3±27.5    | < 0.001 |

|                                 |             |             |         |
|---------------------------------|-------------|-------------|---------|
| Leisure physical activity (Met) | 127.0±198.0 | 125.3±198.7 | 0.830   |
| Metabolic Components            |             |             |         |
| Waist circumference (cm)        | 75.7±6.9    | 82.8±7.0    | < 0.001 |
| HDL-cholesterol (mg/dL)         | 53.1±11.7   | 47.5±10.3   | < 0.001 |
| Triglycerides (mg/dL)           | 112.1±63.4  | 155.5±92.5  | < 0.001 |
| Systolic Blood Pressure (mmHg)  | 111.3±15.6  | 116.7±14.9  | < 0.001 |
| Diastolic Blood Pressure (mmHg) | 73.5±10.0   | 79.6±10.5   | < 0.001 |
| Muscle Strength                 |             |             |         |
| Hand grip strength (HGS)        |             |             |         |
| Mean HGS (kg)                   | 21.8±3.9    | 35.2±5.6    | < 0.001 |
| BMI-relative Mean HGS           | 0.90±0.19   | 1.45±0.26   | < 0.001 |
| Weight-relative Mean HGS        | 0.37±0.07   | 0.51±0.09   | < 0.001 |
| WC-relative Mean HGS            | 0.29±0.06   | 0.43±0.07   | < 0.001 |
| Back muscle strength (BMS)      |             |             |         |
| Mean BMS (kg)                   | 42.7±12.1   | 83.9±19.2   | < 0.001 |
| BMI-relative Mean BMS           | 1.77±0.52   | 3.45±0.81   | < 0.001 |
| Weight-relative Mean BMS        | 0.73±0.21   | 1.22±0.29   | < 0.001 |
| WC-relative Mean BMS            | 0.57±0.16   | 1.02±0.24   | < 0.001 |

Abbreviation: iMetS, incident metabolic syndrome; BMI, body mass index; WC, waist circumference.

**Table S2.** Sex adjusted partial correlation coefficient of relative hand grip strength and metabolic components.

|                          | BMI      | WC       | Weight   | HDL     | TG       | SBP      | DBP      | Fasting glucose | 2hr glucose | Age      |
|--------------------------|----------|----------|----------|---------|----------|----------|----------|-----------------|-------------|----------|
| Mean HGS (kg)            | 0.099*   | 0.065*   | 0.262*   | 0.003   | -0.062*  | -0.035   | 0.005    | -0.019          | -0.111*     | -0.232*  |
| BMI-relative Mean HGS    | -0.484*  | -0.423*  | -0.270*  | 0.159*  | -0.177*  | -0.145*  | -0.136*  | -0.093*         | -0.169*     | -0.227*  |
| Weight-relative Mean HGS | -0.500*  | -0.482*  | -0.462*  | 0.159*  | -0.159*  | -0.136*  | -0.150*  | -0.116*         | -0.144*     | -0.172*  |
| WC-relative Mean HGS     | -0.302*  | -0.410*  | -0.137*  | 0.136*  | -0.169*  | -0.135*  | -0.114*  | -0.096*         | -0.182*     | -0.283*  |
| Mean BMS (kg)            | 0.146**  | 0.111**  | 0.221**  | -0.031  | -0.013   | -0.02    | 0.015    | 0.02            | -0.035      | -0.175** |
| BMI-relative Mean BMS    | -0.276** | -0.245** | -0.155** | 0.083** | -0.105** | -0.101** | -0.088** | -0.035          | -0.087**    | -0.185** |
| Weight-relative Mean BMS | -0.273** | -0.278** | -0.286** | 0.079** | -0.087** | -0.090** | -0.095** | -0.048*         | -0.062**    | -0.140** |
| WC-relative Mean BMS     | -0.135** | -0.225** | -0.055** | 0.063** | -0.095** | -0.090** | -0.070** | -0.036          | -0.092**    | -0.216** |

\*, &lt;0.01 ; \*\*, &lt;0.001

Table S3. Sensitivity analysis for adjusted Cox hazard ratios for inverse one standard deviation of relative hand grip strength and back muscle strength stratified by follow up time, gender and age subgroups.

|                 | Follow-up exam | HGS                           |                               | BMC                          |                               |
|-----------------|----------------|-------------------------------|-------------------------------|------------------------------|-------------------------------|
|                 |                | Women                         | Men                           | Women                        | Men                           |
| BMI-relative    | 3rd            | 1.241 (1.060-1.453)<br>0.007  | 1.275 (1.124-1.446)<br><0.001 | 1.146 (0.970-1.354)<br>0.110 | 1.081 (0.954-1.226)<br>0.222  |
|                 | 5th            | 1.210 (1.062-1.379)<br>0.004  | 1.249 (1.124-1.388)<br><0.001 | 1.178 (1.032-1.344)<br>0.015 | 1.107 (0.999-1.227)<br>0.053  |
|                 | 7th            | 1.187 (1.047-1.345)<br>0.007  | 1.232 (1.113-1.363)<br><0.001 | 1.128 (0.988-1.288)<br>0.074 | 1.079 (0.979-1.190)<br>0.125  |
|                 | 9th            | 1.494 (1.337-1.671)<br><0.001 | 1.470 (1.335-1.618)<br><0.001 | 1.192 (1.072-1.324)<br>0.001 | 1.212 (1.113-1.320)<br><0.001 |
| Weight-relative | 3rd            | 1.220 (1.050-1.418)<br>0.010  | 1.282 (1.134-1.450)<br><0.001 | 1.129 (0.962-1.324)<br>0.137 | 1.083 (0.956-1.228)<br>0.210  |
|                 | 5th            | 1.209 (1.068-1.370)<br>0.003  | 1.232 (1.115-1.361)<br><0.001 | 1.171 (1.032-1.329)<br>0.014 | 1.101 (0.994-1.220)<br>0.066  |
|                 | 7th            | 1.175 (1.039-1.328)<br>0.010  | 1.211 (1.099-1.334)<br><0.001 | 1.113 (0.980-1.265)<br>0.099 | 1.070 (0.970-1.180)<br>0.179  |
|                 | 9th            | 1.454 (1.306-1.620)<br><0.001 | 1.472 (1.342-1.614)<br><0.001 | 1.158 (1.044-1.283)<br>0.005 | 1.212 (1.114-1.317)<br><0.001 |
| WC-relative     | 3rd            | 1.195 (1.011-1.412)<br>0.036  | 1.264 (1.113-1.436)<br><0.001 | 1.087 (0.917-1.289)<br>0.335 | 1.065 (0.936-1.210)<br>0.339  |
|                 | 5th            | 1.148 (1.002-1.316)<br>0.047  | 1.234 (1.110-1.373)<br><0.001 | 1.117 (0.977-1.277)<br>0.105 | 1.094 (0.985-1.215)<br>0.095  |
|                 | 7th            | 1.134 (0.995-1.292)<br>0.059  | 1.213 (1.094-1.344)<br><0.001 | 1.071 (0.937-1.225)<br>0.315 | 1.062 (0.961-1.174)<br>0.236  |
|                 | 9th            | 1.447 (1.293-1.620)<br><0.001 | 1.431 (1.302-1.574)<br><0.001 | 1.135 (1.022-1.261)<br>0.019 | 1.190 (1.092-1.297)<br><0.001 |

Abbreviation: HGS, handgrip strength; BMC, back muscle strength; BMI, body mass index; WC, waist circumference.

Table S4. Univariate hazard ratio (HR) of incident metabolic syndrome associated with quartile group of mean hand grip strength, back muscle strength, and relative muscle strength according to sex.

| Muscle strength | Group                    | HGS                            |                              | BMS                            |                              |
|-----------------|--------------------------|--------------------------------|------------------------------|--------------------------------|------------------------------|
|                 |                          | Women<br>HR (95% CI) P         | Men<br>HR (95% CI) P         | Women<br>HR (95% CI) P         | Men<br>HR (95% CI) P         |
| Mean (kg)       | Q4                       | Reference                      | Reference                    | Reference                      | Reference                    |
|                 | Q3                       | 0.978 (0.746-1.281)<br>0.870   | 1.048 (0.820-1.339)<br>0.708 | 1.150 (0.890-1.485)<br>0.285   | 0.877 (0.692-1.112)<br>0.279 |
|                 | Q2                       | 1.129 (0.872-1.462)<br>0.357   | 1.124 (0.884-1.429)<br>0.340 | 1.051 (0.802-1.376)<br>0.718   | 1.113 (0.884-1.401)<br>0.363 |
|                 | Q1                       | 1.259 (0.964-1.645)<br>0.091   | 1.192 (0.937-1.517)<br>0.152 | 1.170 (0.894-1.530)<br>0.253   | 0.938 (0.738-1.192)<br>0.600 |
|                 | P value for linear trend | 0.053                          | 0.123                        | 0.380                          | 0.907                        |
| BMI-relative    | Q4                       | Reference                      | Reference                    | Reference                      | Reference                    |
|                 | Q3                       | 2.090 (1.506-2.901)<br>< 0.001 | 1.398 (1.067-1.832)<br>0.015 | 1.872 (1.402-2.499)<br>< 0.001 | 1.134 (0.881-1.460)<br>0.330 |
|                 | Q2                       | 2.756 (2.008-3.784)<br>< 0.001 | 1.543 (1.183-2.012)<br>0.001 | 1.946 (1.458-2.598)<br>< 0.001 | 1.511 (1.187-1.924)<br>0.001 |

| Women                    | Variables                 | Baseline            | 8th follow-up       | deta change         | P value             |
|--------------------------|---------------------------|---------------------|---------------------|---------------------|---------------------|
|                          | Mean HGS                  | 21.8±3.8            | 20.9±4.1            | 0.816               | < 0.001             |
|                          | BMI-relative              | 0.90±0.19           | 0.87±0.20           | 0.029               | < 0.001             |
|                          | Weight-relative           | 0.37±0.07           | 0.36±0.07           | 0.012               | < 0.001             |
|                          | WC-relative               | 0.29±0.06           | 0.26±0.06           | 0.026               | < 0.001             |
|                          | Leisure physical activity | 127.0±198.0         | 129.7±156.5         | -2.713              | 0.716               |
| Men                      | Mean HGS                  | 35.2±5.6            | 35.7±6.5            | -0.513              | 0.033               |
|                          | BMI-relative              | 1.45±0.26           | 1.47±0.28           | -0.023              | 0.036               |
|                          | Weight-relative           | 0.51±0.09           | 0.52±0.09           | -0.009              | 0.011               |
|                          | WC-relative               | 0.43±0.07           | 0.42±0.08           | 0.012               | < 0.001             |
|                          | Leisure physical activity | 125.3±198.7         | 198.8±260.0         | -73.471             | < 0.001             |
| <hr/>                    |                           |                     |                     |                     |                     |
|                          | Q1                        | 3.858 (2.822-5.274) | 2.410 (1.870-3.105) | 2.175 (1.628-2.906) | 1.521 (1.194-1.938) |
|                          |                           | < 0.001             | < 0.001             | < 0.001             | 0.001               |
| P value for linear trend |                           | < 0.001             | < 0.001             | < 0.001             | < 0.001             |
| <hr/>                    |                           |                     |                     |                     |                     |
| Weight-relative          | Q4                        | Reference           | Reference           | Reference           | Reference           |
|                          | Q3                        | 2.125 (1.541-2.931) | 1.493 (1.135-1.963) | 1.715 (1.287-2.286) | 1.156 (0.897-1.489) |
|                          |                           | < 0.001             | 0.004               | < 0.001             | 0.262               |
|                          | Q2                        | 2.622 (1.912-3.596) | 1.812 (1.388-2.366) | 1.865 (1.402-2.481) | 1.446 (1.137-1.840) |
|                          |                           | < 0.001             | < 0.001             | < 0.001             | 0.003               |
|                          | Q1                        | 3.517 (2.581-4.791) | 2.515 (1.946-3.250) | 2.013 (1.508-2.687) | 1.611 (1.269-2.044) |
|                          |                           | < 0.001             | < 0.001             | < 0.001             | < 0.001             |
| P value for linear trend |                           | < 0.001             | < 0.001             | < 0.001             | < 0.001             |
| <hr/>                    |                           |                     |                     |                     |                     |
| WC-relative              | Q4                        | Reference           | Reference           | Reference           | Reference           |
|                          | Q3                        | 1.909 (1.391-2.619) | 1.516 (1.159-1.983) | 1.720 (1.298-2.280) | 0.980 (0.761-1.262) |
|                          |                           | < 0.001             | 0.002               | < 0.001             | 0.878               |
|                          | Q2                        | 2.694 (1.983-3.660) | 1.716 (1.316-2.237) | 1.718 (1.294-2.280) | 1.377 (1.087-1.745) |
|                          |                           | < 0.001             | < 0.001             | < 0.001             | 0.008               |
|                          | Q1                        | 3.268 (2.406-4.438) | 2.353 (1.824-3.035) | 2.102 (1.585-2.787) | 1.434 (1.130-1.820) |
|                          |                           | < 0.001             | < 0.001             | < 0.001             | 0.003               |
| P value for linear trend |                           | < 0.001             | < 0.001             | < 0.001             | < 0.001             |

Abbreviation: HGS, handgrip strength; BMC, back muscle strength; BMI, body mass index; WC, waist circumference.

**Table S5.** Change of handgrip, relative handgrip, and leisure physical activity at baseline and 8th follow-up.

| Women | Variables                 | Baseline    | 8th follow-up | deta change | P value |
|-------|---------------------------|-------------|---------------|-------------|---------|
|       | Mean HGS                  | 21.8±3.8    | 20.9±4.1      | 0.816       | < 0.001 |
|       | BMI-relative              | 0.90±0.19   | 0.87±0.20     | 0.029       | < 0.001 |
|       | Weight-relative           | 0.37±0.07   | 0.36±0.07     | 0.012       | < 0.001 |
|       | WC-relative               | 0.29±0.06   | 0.26±0.06     | 0.026       | < 0.001 |
|       | Leisure physical activity | 127.0±198.0 | 129.7±156.5   | -2.713      | 0.716   |
| Men   | Mean HGS                  | 35.2±5.6    | 35.7±6.5      | -0.513      | 0.033   |
|       | BMI-relative              | 1.45±0.26   | 1.47±0.28     | -0.023      | 0.036   |
|       | Weight-relative           | 0.51±0.09   | 0.52±0.09     | -0.009      | 0.011   |
|       | WC-relative               | 0.43±0.07   | 0.42±0.08     | 0.012       | < 0.001 |

Leisure physical  
activity

125.3±198.7

198.8±260.0

-73.471

&lt; 0.001

Abbreviation: HGS, handgrip strength; BMI, body mass index; WC, waist circumference.

**Table S6.** Univariate hazard ratio (HR) of incident metabolic syndrome components associated with one standard deviation increase of mean hand grip strength, back muscle strength, and relative muscle strength according to sex.

|                     | Waist                          | HDL                            | TG                             | HTN                            | DM                             |
|---------------------|--------------------------------|--------------------------------|--------------------------------|--------------------------------|--------------------------------|
|                     | HR (95% CI) P                  |
| <b>Women</b>        |                                |                                |                                |                                |                                |
| Mean HGS (kg)       | 0.902 (0.800-1.018)<br>0.095   | 0.903 (0.806-1.011)<br>0.078   | 0.905 (0.822-0.997)<br>0.043   | 0.951 (0.861-1.049)<br>0.315   | 0.786 (0.682-0.905)<br>0.001   |
| BMI-relative HGS    | 0.526 (0.461-0.600)<br>< 0.001 | 0.876 (0.785-0.976)<br>0.017   | 0.806 (0.731-0.889)<br>< 0.001 | 0.740 (0.667-0.821)<br>< 0.001 | 0.611 (0.525-0.711)<br>< 0.001 |
| Weight-relative HGS | 0.492 (0.432-0.561)<br>< 0.001 | 0.881 (0.788-0.985)<br>0.026   | 0.821 (0.745-0.904)<br>< 0.001 | 0.759 (0.685-0.842)<br>< 0.001 | 0.648 (0.559-0.752)<br>< 0.001 |
| WC-relative HGS     | 0.574 (0.505-0.652)<br>< 0.001 | 0.863 (0.774-0.962)<br>0.008   | 0.807 (0.731-0.890)<br>< 0.001 | 0.739 (0.667-0.819)<br>< 0.001 | 0.610 (0.526-0.708)<br>< 0.001 |
| BMS (kg)            | 0.973 (0.864-1.095)<br>0.648   | 0.917 (0.820-1.027)<br>0.135   | 0.936 (0.854-1.026)<br>0.160   | 0.957 (0.870-1.052)<br>0.361   | 0.875 (0.762-1.005)<br>0.059   |
| BMI-relative BMS    | 0.666 (0.585-0.759)<br>< 0.001 | 0.892 (0.797-0.997)<br>0.044   | 0.857 (0.781-0.939)<br>0.001   | 0.813 (0.736-0.897)<br>< 0.001 | 0.725 (0.626-0.840)<br>< 0.001 |
| Weight-relative BMS | 0.653 (0.574-0.744)<br>< 0.001 | 0.899 (0.803-1.006)<br>0.064   | 0.875 (0.797-0.959)<br>0.005   | 0.836 (0.757-0.922)<br>< 0.001 | 0.769 (0.666-0.888)<br>< 0.001 |
| WC-relative BMS     | 0.722 (0.636-0.820)<br>< 0.001 | 0.888 (0.794-0.993)<br>0.037   | 0.866 (0.789-0.950)<br>0.002   | 0.820 (0.742-0.905)<br>< 0.001 | 0.739 (0.639-0.855)<br>< 0.001 |
| <b>Men</b>          |                                |                                |                                |                                |                                |
| Mean HGS (kg)       | 1.048 (0.795-1.382)<br>0.740   | 0.934 (0.853-1.023)<br>0.142   | 1.041 (0.944-1.149)<br>0.420   | 0.939 (0.858-1.027)<br>0.169   | 0.912 (0.816-1.020)<br>0.106   |
| BMI-relative HGS    | 0.433 (0.317-0.590)<br>< 0.001 | 0.803 (0.732-0.881)<br>< 0.001 | 0.900 (0.817-0.991)<br>0.032   | 0.800 (0.732-0.875)<br>< 0.001 | 0.687 (0.611-0.772)<br>< 0.001 |
| Weight-relative HGS | 0.334 (0.248-0.449)<br>< 0.001 | 0.818 (0.748-0.895)<br>< 0.001 | 0.879 (0.799-0.966)<br>0.008   | 0.788 (0.722-0.861)<br>< 0.001 | 0.692 (0.618-0.774)<br>< 0.001 |
| WC-relative HGS     | 0.464 (0.344-0.626)<br>< 0.001 | 0.813 (0.742-0.891)<br>< 0.001 | 0.895 (0.814-0.985)<br>0.023   | 0.816 (0.747-0.893)<br>< 0.001 | 0.697 (0.622-0.781)<br>< 0.001 |
| BMS (kg)            | 1.230 (0.943-1.605)<br>0.127   | 1.031 (0.946-1.123)<br>0.492   | 1.047 (0.953-1.149)<br>0.339   | 0.967 (0.887-1.055)<br>0.453   | 1.074 (0.968-1.192)<br>0.180   |
| BMI-relative BMS    | 0.667 (0.504-0.883)<br>0.005   | 0.931 (0.855-1.013)<br>0.097   | 0.954 (0.870-1.046)<br>0.316   | 0.866 (0.795-0.942)<br>0.001   | 0.881 (0.794-0.977)<br>0.017   |
| Weight-relative BMS | 0.559 (0.420-0.743)<br>< 0.001 | 0.947 (0.870-1.031)<br>0.210   | 0.937 (0.855-1.027)<br>0.162   | 0.859 (0.790-0.935)<br>< 0.001 | 0.888 (0.801-0.985)<br>0.024   |
| WC-relative BMS     | 0.698 (0.529-0.920)<br>0.011   | 0.940 (0.863-1.024)<br>0.155   | 0.947 (0.864-1.039)<br>0.249   | 0.877 (0.806-0.955)<br>0.003   | 0.891 (0.803-0.988)<br>0.029   |

Abbreviation: HDL, high density lipoprotein-cholesterol ; TG, Triglyceride; HTN, hypertension; DM, diabetes; HGS, hand grip strength; BMS, back muscle strength; HR, hazard ratio, CI; confidence interval; BMI, body mass index; WC, waist circumference.
